# Supplementary material for: Hydroxyphenylbenzene derivatives as glass forming molecules for high resolution photoresists
Source: Royal Society of Chemistry journal article supplement (doi:10.1039/b719108a), 2008-01-01

## Supporting Information

### Hydroxyphenylbenzene Derivatives as Glass Forming Molecules for High Resolution Photoresists

Anuja De Silva<sup>a</sup> and Christopher K. Ober<sup>b\*</sup>

<sup>a</sup>Department of Chemistry and Chemical Biology, Cornell University, Ithaca NY 14850,  
USA.

<sup>b</sup>Department of Materials Science and Engineering, Cornell University, Ithaca NY 14850,  
USA.

\*Corresponding Author: [cober@ccmr.cornell.edu](mailto:cober@ccmr.cornell.edu)

## Contents

|                                          |     |
|------------------------------------------|-----|
| TGA data for HHPB- <i>mp</i> derivatives | p 2 |
| DSC data for HHPB- <i>mp</i> derivatives | p 3 |

TGA data for HHPB-*mp*-50 and HHPB-*mp*-100

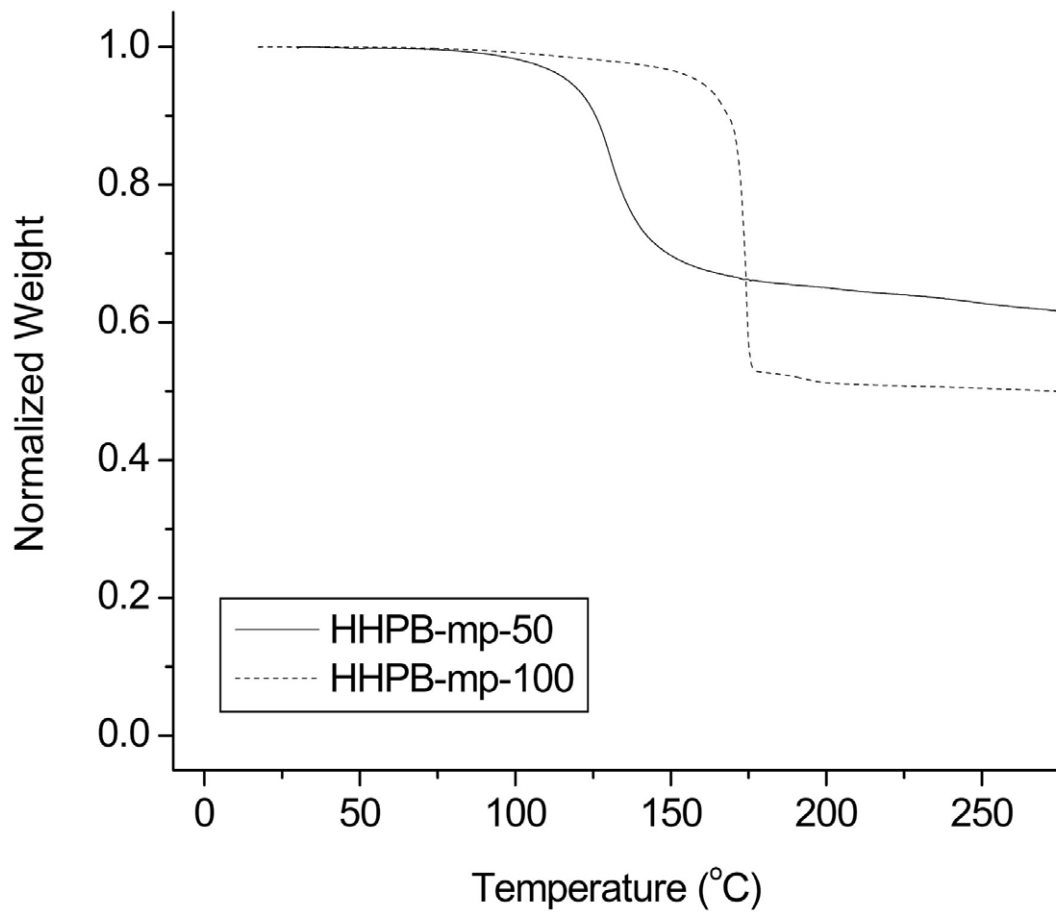

DSC data for HHPB derivatives

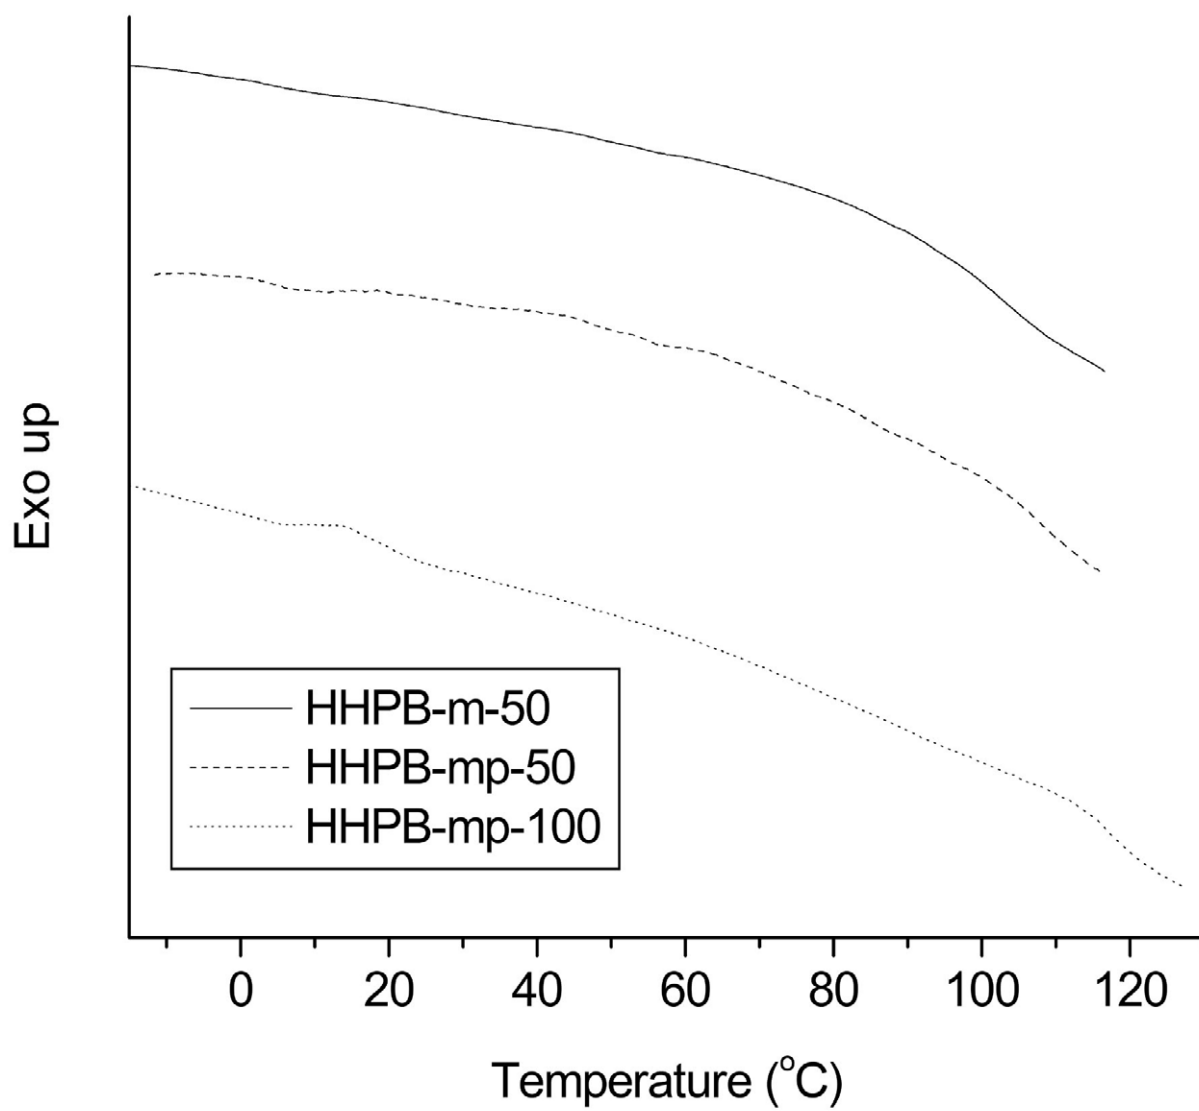

Supplement: b719108a.pdf [file b719108a.pdf]
